# Supplementary material
Source: Springer Nature journal article supplement (https://www.springermedizin.de/resource/supplementary/12883_2014_1052_MOESM3_ESM.pdf/9456438)

Patient 1

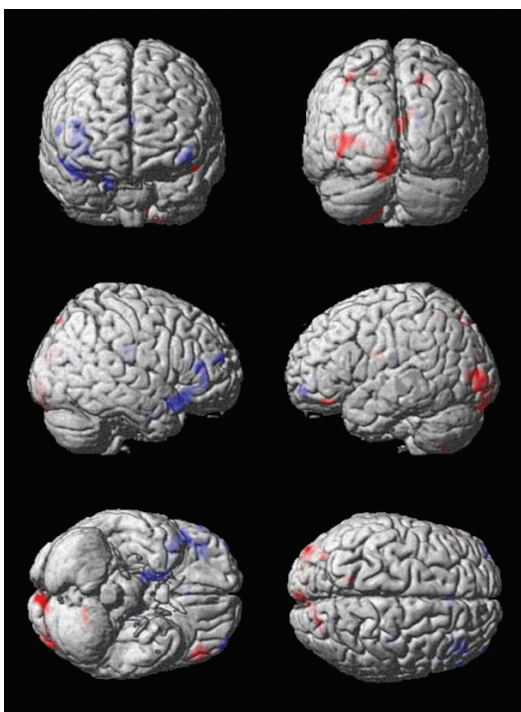

**Anti-  
LGI1**

Patient 2

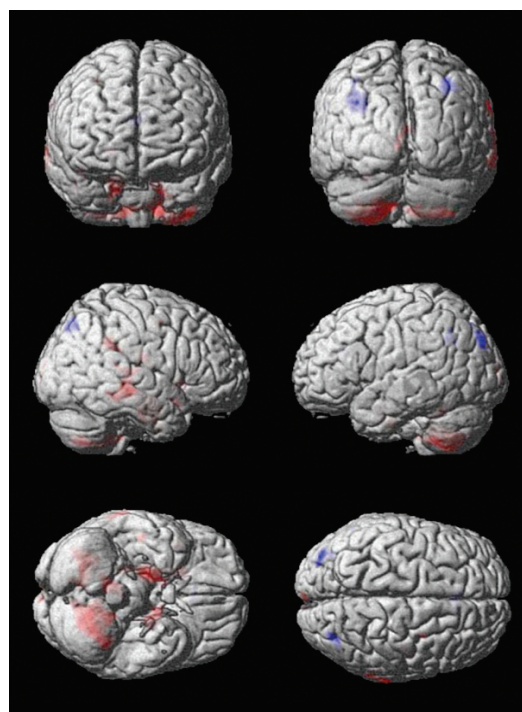

Patient 3

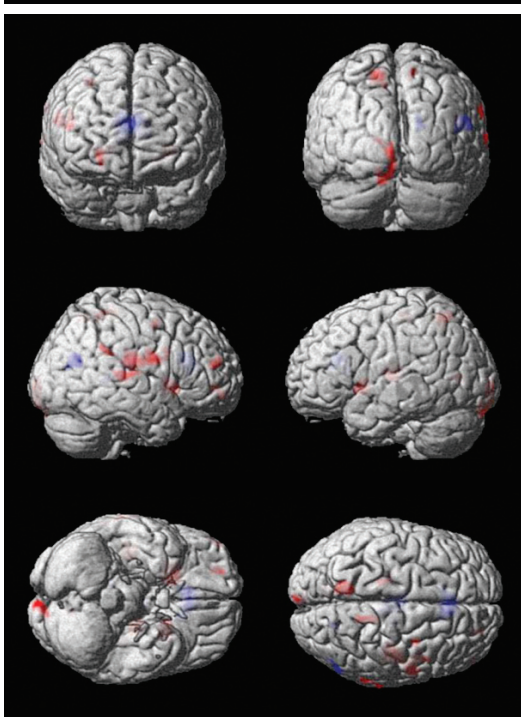

Patient 4

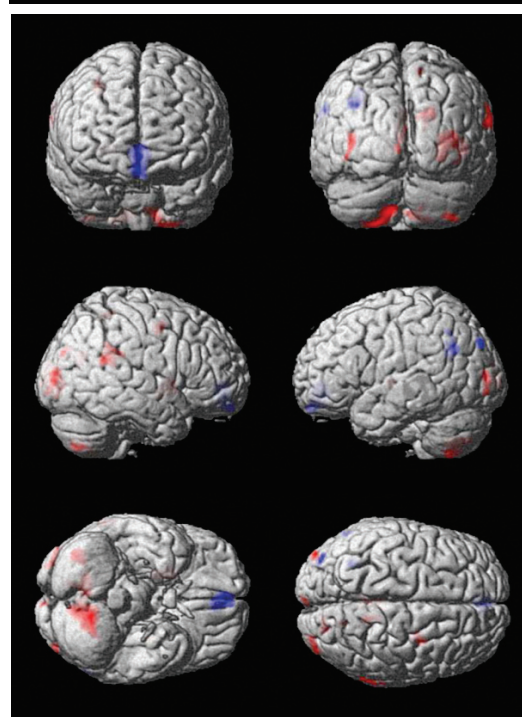

Supplement: MOESM3 [file 9456438]
